# Supplementary material
Source: PubMed Central journal article supplement (PMC7962468)
Supplement: NIHMS1673000-supplement-Supplementary_material.pdf [file NIHMS1673000-supplement-Supplementary_material.pdf]

## Search for gene combinations

avil il10ra

Search

Require

(Show all)

Separate multiple genes by spaces

Filters by trinarization score > 0.95

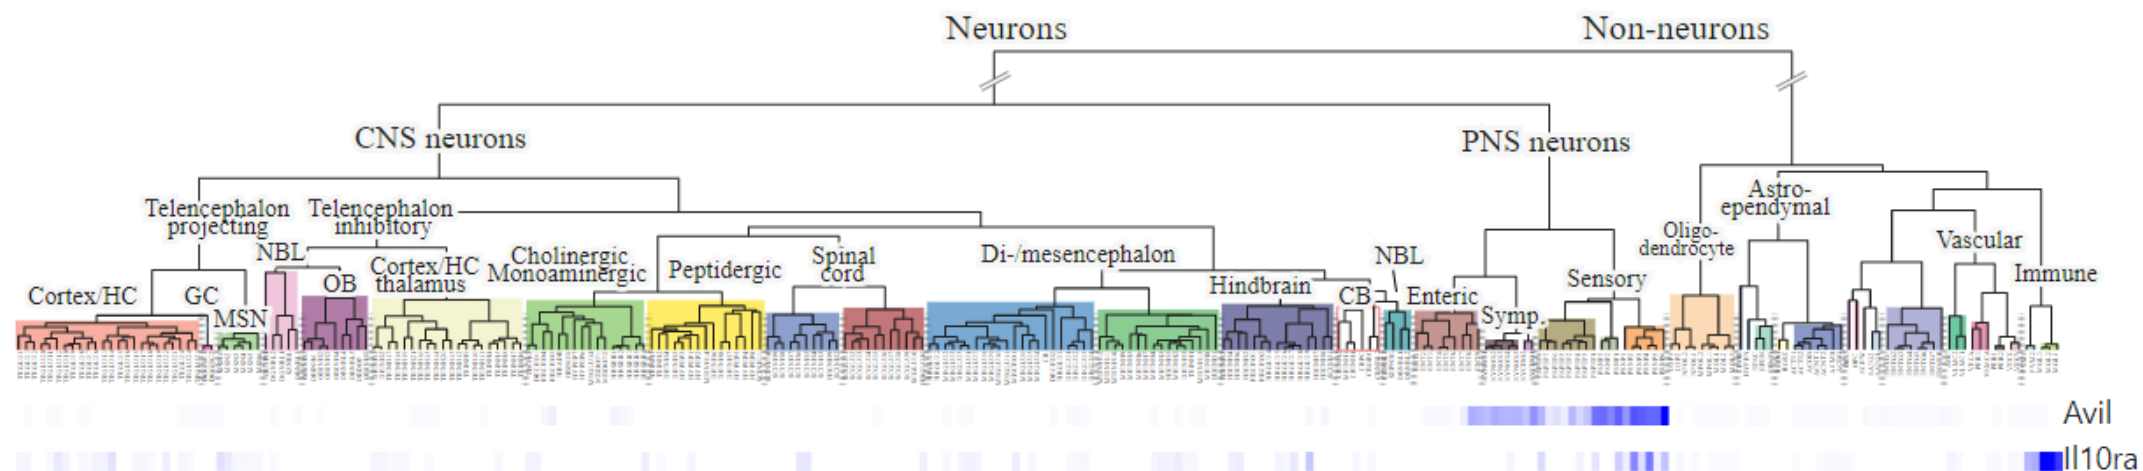

Supplementary Figure 1
